Percentage (%) of patients achieving each biochemical target by time period

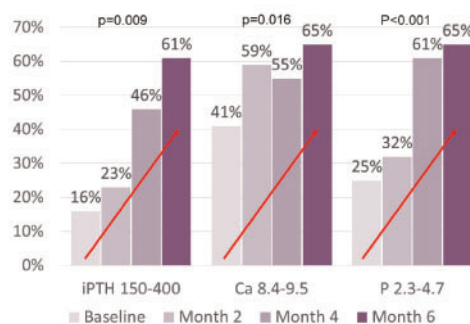

**CONCLUSIONS:** Under daily practice conditions, etelcalcetide seems to be a potent and well tolerated calcimimetic which is effective for controlling SHPT in HD patients, increasing the number of patients achieving biochemical targets.

SP619

#### THE EFFECT OF ETELCALCETIDE IN HEMODIALYSIS PATIENTS WITH SECONDARY HYPERPARATHYROIDISM IN DAILY CLINICAL PRACTICE. A PROSPECTIVE MULTICENTER STUDY

Pablo Molina<sup>1</sup>, Alejandra Yugueros, Javier Martín<sup>2</sup>, Carmen M Pérez-Baylach<sup>3</sup>, Belén Vizcaíno<sup>1</sup>, Mercedes González-Moya<sup>1</sup>, Sandra Beltrán<sup>1</sup>, Julia Kanter<sup>1</sup>, Amparo Bernat<sup>2</sup>, Luis M Pallardó<sup>1</sup>

<sup>1</sup>Hospital Universitari Dr Peset, Universitat de València, Valencia, Spain, <sup>2</sup>Diaverum Nefroclub, Valencia, Spain and <sup>3</sup>Cedival, Valencia, Spain

**INTRODUCTION:** Etelcalcetide is the first intravenous calcimimetic that has demonstrated its safety and effectiveness in randomized clinical trials, although the real-world experience is limited. The aim of this study was to assess the efficacy and tolerability of etelcalcetide in HD patients with secondary hyperparathyroidism (SHPT) under daily practice conditions.

**METHODS:** We evaluated the 6-month experience with etelcalcetide in 38 maintenance HD patients (women: 40%; mean age  $66.6 \pm 14.5$  years; diabetes: 32%) who started therapy with this new calcimimetic. The IV study drug was administered 3 times weekly after HD session. The primary outcomes were the changes in calcium, phosphorus and parathyroid (PTH) levels, and the proportion of patients achieving biochemical targets.

**RESULTS:** The main reason for initiation of treatment was inadequate PTH control (84%) or to reduce the pill burden (16%). The proportion of naïve patients was 19%, whereas 81% were switched from cinacalcet. The majority of patients (69%) received a starting dose of 2.5 mg thrice weekly after HD, with a mean weekly dose of  $6.4 \pm 2.7$  mg and  $11.2 \pm 4.7$  mg at baseline and 6-month follow-up, respectively. PTH levels decreased significantly from 501 (428-608) pg/ml at baseline to 321 (201-482) pg/ml at month 6 ( $p < 0.001$ ). Calcium levels decreased significantly from  $9.2 \pm 0.8$  to  $8.9 \pm 0.7$  ( $p < 0.001$ ). Asymptomatic hypocalcemia  $< 7.5$  mg/dl was observed in 4 cases, which led to reduction dose of etelcalcetide with subsequent recovery. Phosphorus levels decreased from  $5.6 \pm 1.7$  to  $4.4 \pm 1.3$  mg/dl at the end of the study ( $p < 0.001$ ), allowing a significant reduction in the pill burden related to CKD-MBD ( $5.5 \pm 3.2$  Vs.  $4.0 \pm 2.3$  pills/day;  $p = 0.010$ ). None of the patients reported nausea or vomiting. The proportion of patients with biochemical parameters within target ranges increased significantly (Figure).
